# Supplementary material
Source: publisher figshare collection journal article supplement (https://rs.figshare.com/ndownloader/files/13643408)
Supplement: Supplementary file 1 [file 13643408]

	Focal.Genotype	Background	Score	Censor
1	Masc	ControlBackground	8	0
2	Masc	Individual	17	0
3	Masc	ControlBackground	21	0
4	control-elav	ControlBackground	29	0
5	Masc	Individual	31	0
6	Masc	MascBackground	34	1
7	control-traIR	MascBackground	34	0
8	Masc	Individual	35	1
9	control-elav	Individual	35	1
10	Masc	ControlBackground	35	1
11	control-elav	ControlBackground	36	1
12	Masc	MascBackground	36	1
13	Masc	MascBackground	36	1
14	control-traIR	ControlBackground	37	1
15	Masc	MascBackground	37	1
16	Masc	Individual	38	1
17	Masc	Individual	38	1
18	control-traIR	Individual	38	1
19	control-elav	ControlBackground	38	0
20	Masc	MascBackground	38	1
21	Masc	MascBackground	38	1
22	Masc	MascBackground	38	1
23	Masc	MascBackground	38	1
24	Masc	MascBackground	38	1
25	Masc	MascBackground	38	1
26	Masc	MascBackground	38	1
27	Masc	MascBackground	38	1
28	control-elav	MascBackground	38	1
29	control-elav	MascBackground	38	1
30	Masc	ControlBackground	39	1
31	Masc	MascBackground	39	1
32	Masc	MascBackground	39	1
33	control-elav	MascBackground	39	1
34	Masc	MascBackground	40	1
35	Masc	MascBackground	40	1
36	Masc	MascBackground	40	1
37	Masc	MascBackground	40	1
38	Masc	MascBackground	40	1
39	Masc	MascBackground	40	1
40	Masc	MascBackground	40	1
41	Masc	MascBackground	40	1
42	Masc	MascBackground	40	1
43	Masc	MascBackground	40	1
44	Masc	MascBackground	40	1
45	Masc	MascBackground	40	1
46	Masc	MascBackground	40	1
47	Masc	MascBackground	40	1
48	Masc	MascBackground	40	1
49	Masc	MascBackground	40	1
50	Masc	MascBackground	40	1
51	Masc	MascBackground	40	1
52	Masc	MascBackground	40	1
53	Masc	MascBackground	40	1
54	control-elav	MascBackground	40	1
55	control-elav	MascBackground	40	1
56	control-elav	MascBackground	40	1
57	control-elav	MascBackground	40	1
58	control-traIR	MascBackground	44	1
59	Masc	ControlBackground	47	1
60	Masc	ControlBackground	47	1
61	Masc	ControlBackground	47	1
62	Masc	MascBackground	47	1
63	control-traIR	MascBackground	47	1
64	Masc	Individual	49	1
65	Masc	Individual	49	1
66	Masc	Individual	49	1
67	Masc	ControlBackground	49	1
68	Masc	ControlBackground	49	1
69	Masc	MascBackground	49	1
70	Masc	Individual	50	1
71	Masc	ControlBackground	50	1
72	Masc	ControlBackground	50	1
73	Masc	ControlBackground	53	1
74	Masc	ControlBackground	53	1
75	Masc	ControlBackground	53	1
76	Masc	MascBackground	53	1
77	control-elav	MascBackground	53	1
78	control-elav	MascBackground	53	1
79	control-traIR	MascBackground	53	1
80	Masc	Individual	55	1
81	Masc	Individual	55	1
82	Masc	Individual	55	1
83	Masc	Individual	55	1
84	control-elav	Individual	55	1
85	control-traIR	Individual	55	1
86	control-traIR	Individual	55	1
87	Masc	ControlBackground	55	1
88	Masc	ControlBackground	55	1
89	Masc	Individual	56	1
90	Masc	ControlBackground	56	1
91	Masc	ControlBackground	56	1
92	control-traIR	MascBackground	56	1
93	Masc	ControlBackground	57	1
94	Masc	MascBackground	57	1
95	Masc	Individual	60	1
96	Masc	Individual	60	1
97	Masc	Individual	60	1
98	control-elav	Individual	60	1
99	control-elav	Individual	60	1
100	control-elav	Individual	60	1
101	control-traIR	Individual	60	1
102	control-traIR	Individual	60	1
103	Masc	ControlBackground	60	1
104	Masc	ControlBackground	60	1
105	Masc	ControlBackground	60	1
106	Masc	ControlBackground	60	1
107	Masc	ControlBackground	60	1
108	control-elav	MascBackground	60	1
109	control-elav	Individual	61	1
110	Masc	ControlBackground	62	1
111	control-elav	ControlBackground	62	1
112	control-traIR	MascBackground	62	1
113	control-traIR	MascBackground	62	1
114	Masc	Individual	63	1
115	Masc	Individual	63	1
116	Masc	Individual	63	1
117	Masc	Individual	63	1
118	Masc	Individual	63	1
119	Masc	Individual	63	1
120	Masc	Individual	63	1
121	Masc	Individual	63	1
122	Masc	ControlBackground	63	1
123	Masc	ControlBackground	63	1
124	Masc	ControlBackground	63	1
125	Masc	ControlBackground	63	1
126	Masc	ControlBackground	63	1
127	Masc	ControlBackground	63	1
128	Masc	ControlBackground	63	1
129	Masc	ControlBackground	63	1
130	control-traIR	ControlBackground	63	1
131	control-traIR	ControlBackground	63	1
132	Masc	Individual	64	1
133	control-elav	MascBackground	64	1
134	control-traIR	MascBackground	64	1
135	control-traIR	MascBackground	64	1
136	control-traIR	MascBackground	64	1
137	control-traIR	MascBackground	64	1
138	Masc	Individual	67	1
139	control-elav	Individual	67	1
140	Masc	ControlBackground	67	1
141	Masc	ControlBackground	67	1
142	Masc	ControlBackground	67	1
143	control-elav	ControlBackground	67	1
144	control-traIR	ControlBackground	67	1
145	control-traIR	ControlBackground	67	1
146	control-elav	MascBackground	67	1
147	control-elav	MascBackground	67	1
148	control-elav	MascBackground	67	1
149	control-traIR	MascBackground	67	1
150	control-traIR	MascBackground	67	1
151	control-traIR	MascBackground	67	1
152	control-traIR	MascBackground	67	1
153	Masc	Individual	68	1
154	control-traIR	Individual	68	1
155	Masc	ControlBackground	68	1
156	Masc	MascBackground	68	1
157	Masc	Individual	69	1
158	Masc	Individual	69	1
159	Masc	Individual	69	1
160	Masc	Individual	69	1
161	Masc	Individual	69	1
162	control-elav	Individual	69	1
163	control-elav	Individual	69	1
164	control-traIR	Individual	69	1
165	control-traIR	Individual	69	1
166	control-traIR	Individual	69	1
167	Masc	ControlBackground	69	1
168	control-elav	ControlBackground	69	1
169	control-elav	ControlBackground	69	1
170	control-elav	ControlBackground	69	1
171	control-elav	ControlBackground	69	1
172	control-elav	ControlBackground	69	1
173	control-traIR	ControlBackground	69	1
174	control-traIR	ControlBackground	69	1
175	control-traIR	ControlBackground	69	1
176	control-traIR	ControlBackground	69	1
177	Masc	Individual	70	1
178	Masc	Individual	70	1
179	control-elav	Individual	70	1
180	control-elav	Individual	70	1
181	control-traIR	Individual	70	1
182	Masc	ControlBackground	70	1
183	control-traIR	ControlBackground	70	1
184	control-elav	Individual	71	1
185	control-elav	ControlBackground	71	1
186	Masc	Individual	74	1
187	Masc	Individual	74	1
188	control-traIR	Individual	74	1
189	Masc	ControlBackground	74	1
190	control-elav	ControlBackground	74	1
191	control-elav	ControlBackground	74	1
192	control-elav	ControlBackground	74	1
193	control-elav	ControlBackground	74	1
194	control-traIR	ControlBackground	74	1
195	control-traIR	ControlBackground	74	1
196	control-elav	MascBackground	74	1
197	control-elav	Individual	76	1
198	control-elav	Individual	76	1
199	control-elav	Individual	76	1
200	control-traIR	Individual	76	1
201	control-traIR	Individual	76	1
202	control-traIR	Individual	76	1
203	control-traIR	ControlBackground	76	1
204	control-traIR	ControlBackground	78	1
205	control-traIR	ControlBackground	78	1
206	control-traIR	Individual	80	1
